**PS Form 3526** **Statement of Ownership, Management, and Circulation**  
**(All Periodicals Publications Except Requester Publications)**

|                                                                                                                                                                                                                                                                                                                                                                                                                                                                                                                                                                         |                                                       |                                           |                                                             |
|-------------------------------------------------------------------------------------------------------------------------------------------------------------------------------------------------------------------------------------------------------------------------------------------------------------------------------------------------------------------------------------------------------------------------------------------------------------------------------------------------------------------------------------------------------------------------|-------------------------------------------------------|-------------------------------------------|-------------------------------------------------------------|
| 1. Publication Title<br>AMERICAN PSYCHIATRIC ASSOCIATION/<br>PSYCHIATRIC SERVICES                                                                                                                                                                                                                                                                                                                                                                                                                                                                                       | 2. Publication Number<br>251280                       | ISSN<br>10752730                          | 3. Filing Date<br>09/15/2022                                |
| 4. Issue Frequency<br>MONTHLY                                                                                                                                                                                                                                                                                                                                                                                                                                                                                                                                           | 5. Number of Issues Published Annually<br>12          | 6. Annual Subscription Price<br>\$ 185.00 |                                                             |
| 7. Complete Mailing Address of Known Office of Publication<br>800 MAINE AVE SW STE 900<br>WASHINGTON, VA, DC 20024-2812                                                                                                                                                                                                                                                                                                                                                                                                                                                 |                                                       |                                           | Contact Person<br>BRIAN COLE<br>Telephone<br>(202) 459-9750 |
| 8. Complete Mailing Address of Headquarters or General Business Office of Publisher<br>800 Maine Ave, SW<br>Ste 900<br>Washington, DC 20024-2812                                                                                                                                                                                                                                                                                                                                                                                                                        |                                                       |                                           |                                                             |
| 9. Full Names and Complete Mailing Addresses of Publisher, Editor, and Managing Editor                                                                                                                                                                                                                                                                                                                                                                                                                                                                                  |                                                       |                                           |                                                             |
| Publisher (Name and complete mailing address)<br>Patrick Hansard<br>800 MAINE AVE SW STE 900<br>WASHINGTON, DC 20024-2812                                                                                                                                                                                                                                                                                                                                                                                                                                               |                                                       |                                           |                                                             |
| Editor (Name and complete mailing address)<br>Lisa Dixon<br>800 Maine Ave, SW<br>Ste 900<br>Washington, DC 20024-2812                                                                                                                                                                                                                                                                                                                                                                                                                                                   |                                                       |                                           |                                                             |
| Managing Editor (Name and complete mailing address)<br>Damaris Jackson<br>800 Maine Ave, SW<br>Ste 900<br>Washington, DC 20024-2812                                                                                                                                                                                                                                                                                                                                                                                                                                     |                                                       |                                           |                                                             |
| 10. Owner (Do not leave blank. If the publication is owned by a corporation, give the name and address of the corporation immediately followed by the names and addresses of all stockholders owning or holding 1 percent or more of the total amount of stock. If not owned by a corporation, give names and addresses of the individual owners. If owned by a partnership or other unincorporated firm, give its name and address as well as those of each individual owner. If the publication is published by a nonprofit organization, give its name and address.) |                                                       |                                           |                                                             |
| Full Name                                                                                                                                                                                                                                                                                                                                                                                                                                                                                                                                                               | Complete Mailing Address                              |                                           |                                                             |
| American Psychiatric Assn                                                                                                                                                                                                                                                                                                                                                                                                                                                                                                                                               | 800 Maine Ave, SW, Ste 900, Washington, DC 20024-2812 |                                           |                                                             |
| 11. Known Bondholders, Mortgagees, and Other Security Holders Owning or Holding 1 Percent or More of Total Amount of Bonds, Mortgages, or Other Securities. If none, check box <input checked="" type="checkbox"/> None                                                                                                                                                                                                                                                                                                                                                 |                                                       |                                           |                                                             |
| Full Name                                                                                                                                                                                                                                                                                                                                                                                                                                                                                                                                                               | Complete Mailing Address                              |                                           |                                                             |

PS Form 3526, September 2007 (Page 1) **PRIVACY NOTICE:** See our privacy policy on [www.usps.com](http://www.usps.com)

|                                                                                                                                                                                                                                                                                                                                                        |                                                          |                                                             |
|--------------------------------------------------------------------------------------------------------------------------------------------------------------------------------------------------------------------------------------------------------------------------------------------------------------------------------------------------------|----------------------------------------------------------|-------------------------------------------------------------|
| 13. Publication Title<br>AMERICAN PSYCHIATRIC ASSOCIATION/PSYCHIATRIC SERVICES                                                                                                                                                                                                                                                                         | 14. Issue Date for Circulation Data Below<br>09/01/2022  |                                                             |
| 15. Extend and Nature of Circulation                                                                                                                                                                                                                                                                                                                   | Average No. Copies Each Issue During Preceding 12 Months | No. Copies of Single Issue Published Nearest to Filing Date |
| a. Total Numbers of Copies (Net press run)                                                                                                                                                                                                                                                                                                             | 311                                                      | 309                                                         |
| b. Paid Circulation (By Mail and Outside the Mail)                                                                                                                                                                                                                                                                                                     |                                                          |                                                             |
| (1) Mailed Outside County Paid Subscriptions Stated on PS Form 3541 (include paid distribution above nominal rate, advertiser's proof copies, and exchange copies)                                                                                                                                                                                     | 164                                                      | 182                                                         |
| (2) Mailed In-County Paid Subscriptions Stated on PS Form 3541 (include paid distribution above nominal rate, advertiser's proof copies, and exchange copies)                                                                                                                                                                                          | 0                                                        | 0                                                           |
| (3) Paid Distribution Outside the Mails Including Sales Through Dealers and Carriers, Street Vendors, Counter Sales, and Other Paid Distribution Outside USPS                                                                                                                                                                                          | 0                                                        | 0                                                           |
| (4) Paid Distribution by Other Classes of Mail Through the USPS (e.g. First-Class Mail)                                                                                                                                                                                                                                                                | 0                                                        | 0                                                           |
| c. Total Paid Distribution (Sum of 15b (1), (2), (3), (4))                                                                                                                                                                                                                                                                                             | 164                                                      | 182                                                         |
| d. Free or Nominal Rate Distribution (By Mail and Outside the Mail)                                                                                                                                                                                                                                                                                    |                                                          |                                                             |
| (1) Free or Nominal Rate Outside County Copies included on PS Form 3541                                                                                                                                                                                                                                                                                | 0                                                        | 0                                                           |
| (2) Free or Nominal Rate In-County Copies included on PS Form 3541                                                                                                                                                                                                                                                                                     | 0                                                        | 0                                                           |
| (3) Free or Nominal Rate Copies Mailed at Other Classes Through the USPS (e.g. First-Class Mail)                                                                                                                                                                                                                                                       | 0                                                        | 0                                                           |
| (4) Free or Nominal Rate Distribution Outside the Mail (Carriers or other means)                                                                                                                                                                                                                                                                       | 80                                                       | 50                                                          |
| e. Total Free or Nominal Rate Distribution (Sum of 15d (1), (2), (3), (4))                                                                                                                                                                                                                                                                             | 80                                                       | 50                                                          |
| f. Total Distribution (Sum of 15c and 15e)                                                                                                                                                                                                                                                                                                             | 244                                                      | 232                                                         |
| g. Copies not Distributed                                                                                                                                                                                                                                                                                                                              | 0                                                        | 0                                                           |
| h. Total (Sum of 15f and 15g)                                                                                                                                                                                                                                                                                                                          | 244                                                      | 232                                                         |
| i. Percent Paid ((15c / 15f) times 100)                                                                                                                                                                                                                                                                                                                | 67.21 %                                                  | 78.45 %                                                     |
| 16. If total circulation includes electronic copies, report that circulation on lines below.                                                                                                                                                                                                                                                           |                                                          |                                                             |
| a. Paid Electronic Copies                                                                                                                                                                                                                                                                                                                              | 0                                                        | 0                                                           |
| b. Total Paid Print Copies (Line 15c) + Paid Electronic Copies                                                                                                                                                                                                                                                                                         | 0                                                        | 0                                                           |
| c. Total Print Distribution (Line 15f) + Paid Electronic Copies                                                                                                                                                                                                                                                                                        | 0                                                        | 0                                                           |
| d. Percent Paid (Both Print and Electronic Copies)                                                                                                                                                                                                                                                                                                     | 0.00 %                                                   | 0.00 %                                                      |
| <input type="checkbox"/> I certify that 50% of all my distributed copies (Electronic and Print) are paid above a nominal price.                                                                                                                                                                                                                        |                                                          |                                                             |
| 17. Publication of Statement of Ownership                                                                                                                                                                                                                                                                                                              |                                                          |                                                             |
| <input checked="" type="checkbox"/> If the publication is a general publication, publication of this statement is required. Will be printed in the 11/01/2022 issue of this publication. <input type="checkbox"/> Publication not required.                                                                                                            |                                                          |                                                             |
| 18. Signature and Title of Editor, Publisher, Business Manager, or Owner                                                                                                                                                                                                                                                                               | Title                                                    | Date                                                        |
| Brian Cole                                                                                                                                                                                                                                                                                                                                             | Publishing Operations Manager                            | 09/15/2022 10:09:29 AM                                      |
| I certify that all information furnished on this form is true and complete. I understand that anyone who furnishes false or misleading information on this form or who omits material or information requested on the form may be subject to criminal sanctions (including fines and imprisonment) and/or civil sanctions (including civil penalties). |                                                          |                                                             |

PS Form 3526, September 2007 (Page 2) **PRIVACY NOTICE:** See our privacy policy on [www.usps.com](http://www.usps.com)



Searching for the perfect psychiatric career?

## Let APA JobCentral help!

### Manage Your Career

- Browse hundreds of active job listings!
- Create an account to save jobs, store multiple resumes and cover letters and communicate with employers through our internal messaging system.
- Set up multiple job alerts specifying your skills, interests and location to receive e-mails when employers post jobs that match your criteria.

### Recruit for Open Positions

- Post your job in front of thousands of highly qualified psychiatrists.
- Cross promote your job listing in Psychiatric News.
- Search the anonymous resume database to find your ideal candidate.

[jobs.psychiatry.org](http://jobs.psychiatry.org)

AMERICAN PSYCHIATRIC ASSOCIATION **JOBCENTRAL** The Career Hub for Psychiatry

AH2203

## Seeking Value

### Balancing Cost and Quality in Psychiatric Care

Edited by Wesley E. Sowers, M.D., and Jules M. Ranz, M.D. Group for the Advancement of Psychiatry

**Seeking Value: Balancing Cost and Quality in Psychiatric Care**, a comprehensive volume by the Group for the Advancement of Psychiatry's Mental Health Services Committee, examines the myriad factors that have led to the current state of health care in the United States—starting with an analysis of the meaning and history of value measurement—but it does not stop there. It offers a holistic vision for health care reform, one in which psychiatric professionals play a pivotal role.

2021 • 643 pages • ISBN 978-0-87318-225-6  
Hardcover • \$85.00 • Item #7225

2021 • 643 pages • ISBN 978-0-87318-226-3  
eBook • \$68.00 • Item #7226

AMERICAN PSYCHIATRIC ASSOCIATION PUBLISHING

ORDER @ [www.appi.org](http://www.appi.org) | Email: [appi@psych.org](mailto:appi@psych.org) | Toll Free: 1-800-368-5777

20% Discount for American Psychiatric Association Members  
25% Discount for APA Resident-Fellow Members

Follow us on and

AH2232

# ▶ PODCASTS from APA Publishing

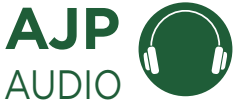

## AJP Audio

Host: Aaron van Dorn

Each episode features an in-depth interview with authors featured in that month's issue of *The American Journal of Psychiatry*.

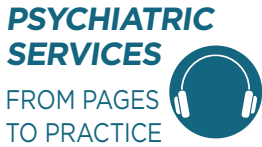

## Psychiatric Services From Pages to Practice

Hosts: Lisa Dixon, M.D., M.P.H., Editor, *Psychiatric Services*, and Josh Berezin, M.D., M.S.

Learn about the latest mental health services research published in *Psychiatric Services* and why it is relevant. Topics include community-based treatment programs, collaborative care, evidence-based treatment and service delivery, criminal and social justice, policy analysis, and more.

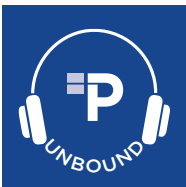

## Psychiatry Unbound

Host: Laura Roberts, M.D., M.A., Editor-in-Chief, APA Publishing Books

APA Publishing's Books podcast offers the opportunity to hear the voices behind the most prominent psychiatric scholarship in the field today. Learn about important topics in the field of psychiatry and see how our authors are making an impact in clinical settings throughout the world.

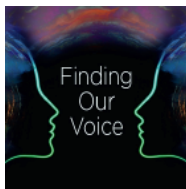

## Finding Our Voice

Host: Sanya Virani, MBBS, MPH

*Finding Our Voice* brings the viewpoints and opinions of the next generation of psychiatrists—including residents, fellows, and early career psychiatrists—to the forefront. Topics covered include systemic racism and social determinants.

Subscribe Today!

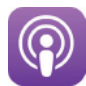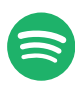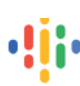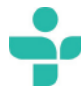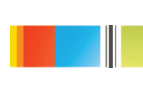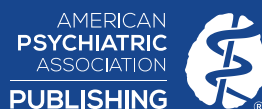

# NEW TITLES in PSYCHIATRY

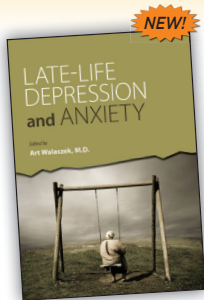

**NEW!**

## Late-Life Depression and Anxiety

Edited by Art Walaszek, M.D.

This book empowers health care professionals to accurately identify and diagnose anxiety and depression in older adult patients and help them find relief, stay independent, and lower their risk of suicide. The book discusses dependable assessment methods that consider multiple factors of mental health, including medical, behavioral, personal, social, and spiritual and provides guidance on culturally sensitive care to geriatric patients of diverse races, ethnicities, gender identities and sexual orientations, and intellectual abilities.

2022 • 376 pages • ISBN 978-1-61537-347-5 • Paperback • \$69.00 • Item #37347  
2022 • 376 pages • ISBN 978-1-61537-441-0 • eBook • \$55.00 • Item #37441

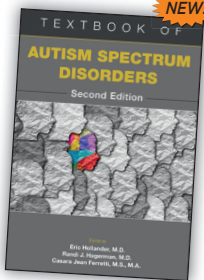

**NEW!**

## Textbook of Autism Spectrum Disorders, Second Edition

Edited by Eric Hollander, M.D.,  
Randi Hagerman, M.D., and Casara Ferretti, M.S.

Unrivaled in its thoroughness, this volume discusses issues of assessment and evaluation; examines the etiology of autism spectrum disorder and its recognized associations with other medical conditions; analyzes standard and experimental treatments; and delves into social policy issues pertinent to individuals with autism spectrum disorder and those who treat them. With summary points in each chapter and copious lists of recommended readings,

this is an indispensable resource.

2022 • 752 pages • ISBN 978-1-61537-304-8 • Hardcover • \$115.00 • Item #37304  
2022 • 752 pages • ISBN 978-1-61537-421-2 • eBook • \$85.00 • Item #37421

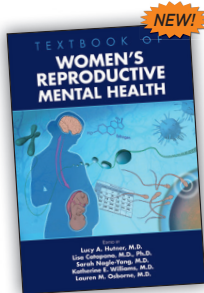

**NEW!**

## Textbook of Women's Reproductive Mental Health

Edited by Lucy A. Hutner, M.D.,  
Lisa A. Catapano, M.D., Ph.D.,  
Sarah M. Nagle-Yang, M.D.,  
Katherine E. Williams, M.D.,  
and Lauren M. Osborne, M.D.

This is the first definitive guide to understanding, diagnosing, and treating the unique mental health needs of women and others who undergo female reproductive transitions during their reproductive lives. The book provides real-world insights into the mental, emotional, and behavioral disturbances related to female reproductive stages—how these disorders present themselves, the underlying causes of specific conditions, and the latest evidence-based guidance for treatment.

2022 • 784 pages • ISBN 978-1-61537-306-2 • Hardcover • \$135.00 • Item #37306  
2022 • 784 pages • ISBN 978-1-61537-386-4 • eBook • \$108.00 • Item #37386

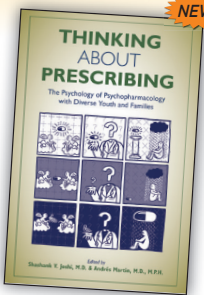

**NEW!**

## Thinking About Prescribing The Psychology of Psychopharmacology With Diverse Youth and Families

Edited by Shashank V. Joshi, M.D., FAAP,  
DFAACAP, and Andrés Martin, M.D., M.P.H.

This volume makes the case for an ongoing alliance between psychopharmacotherapists, young patients, and their families. Chapters tackle issues ranging from the psychodynamics of medication use in adolescents with serious mental illness, the synergistic role of primary care providers and psychotherapists, engaging in patients, to prescribing via telemedicine. Readers will pick up the foundational knowledge they need to develop a partnership with patients that is based on trust and candid communication—rather than on just the cold facts psychotropic medications.

2022 • 395 pages • ISBN 978-1-61537-388-8 • Paperback • \$65.00 • Item #37388  
2022 • 395 pages • ISBN 978-1-61537-389-5 • eBook • \$52.00 • Item #37389

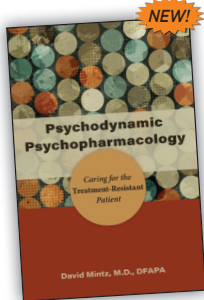

**NEW!**

## Psychodynamic Psychopharmacology Caring for the Treatment-Resistant Patient

David Mintz, M.D.

This new guide emphasizes integrating research on evidence-based prescribing processes with psychodynamic insights and skills to enhance and optimize treatment outcomes with difficult-to-treat patients. The book examines the incidence and nature of pharmacological treatment resistance, exploring common psychodynamics that contribute to resistance and preparing readers to better understand and formulate the processes that interfere with the healthy use of medications.

2022 • 295 pages • ISBN 978-1-61537-152-5 • Paperback • \$62.00 • Item #37152  
2022 • 295 pages • ISBN 978-1-61537-400-7 • eBook • \$49.95 • Item #37400

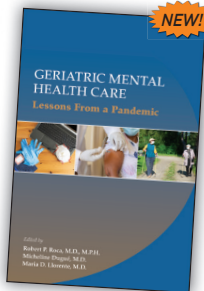

**NEW!**

## Geriatric Mental Health Care Lessons from a Pandemic

Edited by Robert P. Roca, M.D., M.P.H.,  
Micheline Dugue, M.D.,  
and Maria Llorente, M.D., FAPA

The effects of the COVID-19 pandemic on older adults have been well documented. In the case of older patients with mental illness, these challenges are magnified. The authors of this volume seek to share emerging practices that clinicians and systems can emulate. Introductory case vignettes, easily referenced key takeaways, and multiple-choice questions designed to reinforce learning offer

detailed descriptions of clinical and social innovations to mitigate the impact of the pandemic on older patients.

2022 • 384 pages • ISBN 978-1-61537-465-6 • Paperback • \$58.00 • Item #37465  
2022 • 384 pages • ISBN 978-1-61537-466-3 • eBook • \$46.50 • Item #37466

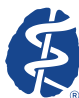

Source: https://ps.psychiatryonline.org/doi/suppl/10.1176/ps.2022.73.issue-11/suppl_file/back.pdf
