# Psychiatric Services

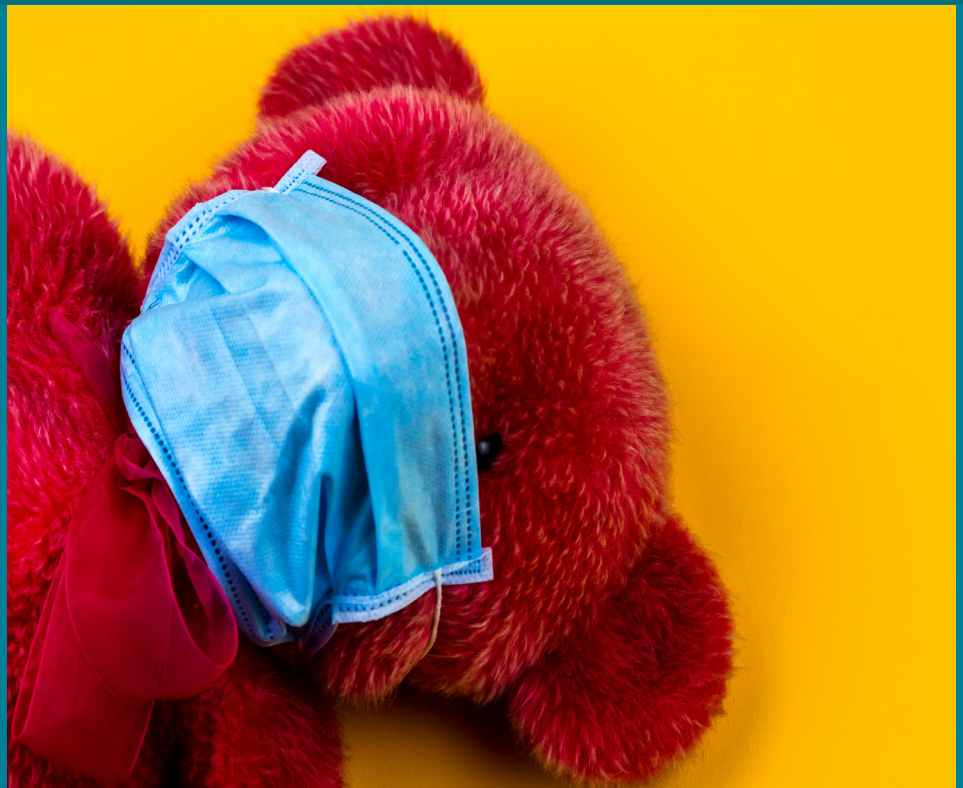

Acute mental health care use in U.S. children's hospitals  
before and after COVID-19 school closure

Identifying schizophrenia spectrum disorder diagnoses in large data sets

Review of "serious mental illness": a call for clarity

Quality improvement approach to increasing inpatient psychiatric rehabilitation
